# Supplementary material for: Scalable fabrication of metal–phenolic nanoparticles by coordination-driven flash nanocomplexation for cancer theranostics
Source: Royal Society of Chemistry journal article supplement (doi:10.1039/c9nr02185j), 2019-01-01
Supplement: c9nr02185j1.pdf [file c9nr02185j1.pdf]

## Electronic Supplementary Information

### **Scalable fabrication of metal-phenolic nanoparticle by coordination-driven flash nanocomplexation for cancer theranostics**

Zhijia Liu,<sup>\*,a</sup> Zhicheng Le,<sup>a</sup> Liejing Lu,<sup>b</sup> Ying Zhu,<sup>c</sup> Chengbiao Yang,<sup>a</sup> Pengfei Zhao,<sup>a</sup> Zhiyong Wang,<sup>a</sup> Jun Shen,<sup>b</sup> Lixin Liu,<sup>a</sup> Yongming Chen<sup>\*,a</sup>

<sup>a</sup>School of Materials Science and Engineering, Key Laboratory for Polymeric Composite and Functional Materials of Ministry of Education, GD Research Center for Functional Biomaterials Engineering and Technology, Sun Yat-sen University, Guangzhou 510275, China

<sup>b</sup>Department of Radiology, Sun Yat-sen Memorial Hospital, Sun Yat-sen University, Guangzhou 510120, China

<sup>c</sup>Department of Radiology, The First Affiliated Hospital, Sun Yat-sen University, Guangzhou 510080, China

\*Corresponding authors:

Zhijia Liu, E-mail: liuzhj9@mail.sysu.edu.cn

Yongming Chen, E-mail: chenym35@mail.sysu.edu.cn

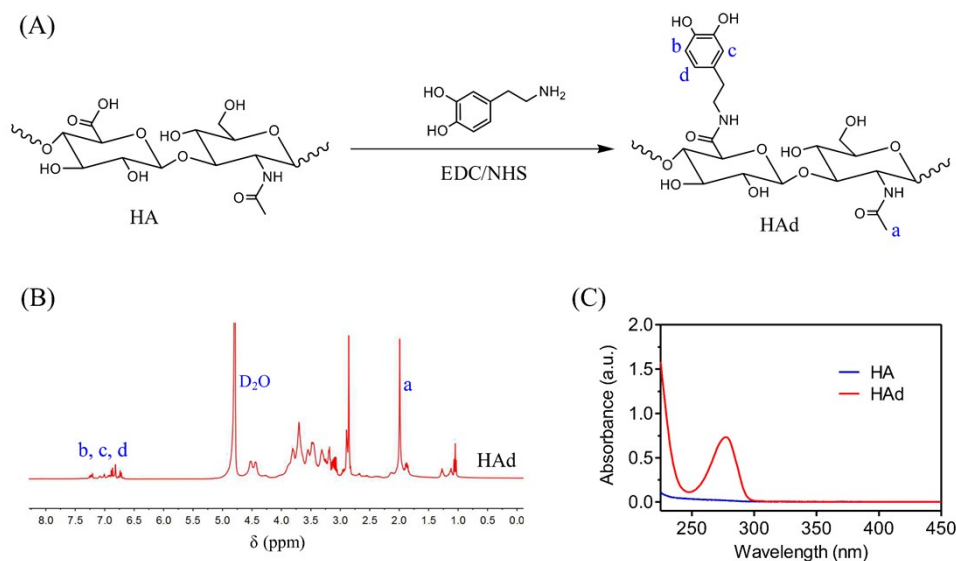

**Fig. S1** Synthesis and characterization of HAd. (A) Synthetic route of HAd. (B)  $^1\text{H}$  NMR spectrum of HAd (10 mg/mL) in  $\text{D}_2\text{O}$ . (C) UV-vis spectra of HA and HAd solution with a concentration of 0.5 mg/mL, respectively.

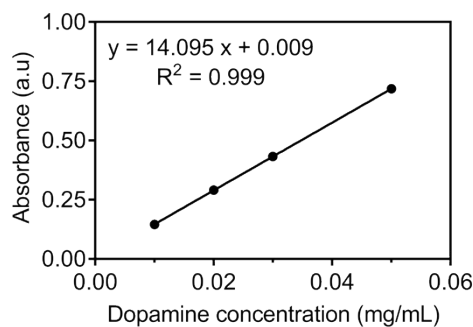

**Fig. S2** Calibration curve of UV-vis absorbance of free dopamine solution at 280 nm.

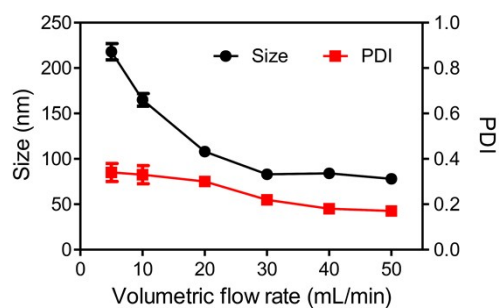

**Fig. S3** Effect of flow rates on the hydrodynamic diameter and PDI of DITH. The prepared conditions: 1 mg/mL DOX, 1.2 mM iron(III), 0.2 mg/mL TA and 2 mg/mL HAd.

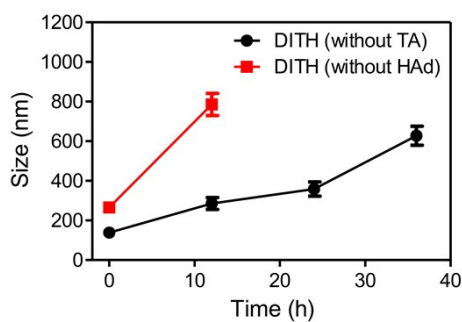

**Fig. S4** Colloidal stability of the DITH produced by a cFNC process without using TA or HAd component, respectively.

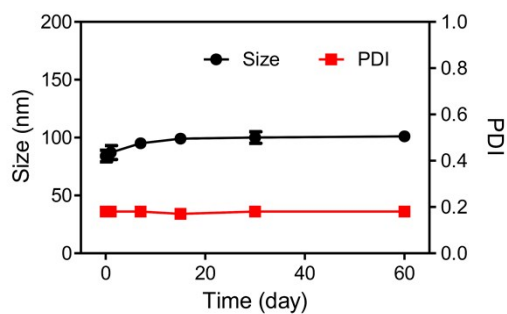

**Fig. S5** Colloidal stability of the optimized DITH after long-term storage at 4 °C.

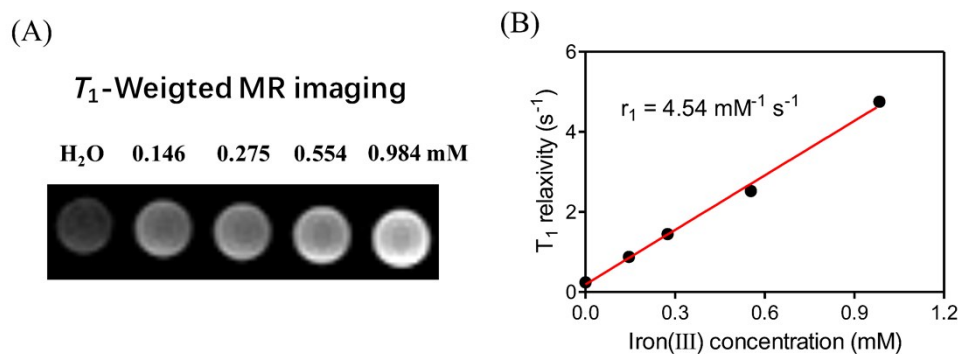

**Fig. S6** (A)  $T_1$ -weighted MR images of DITH with various concentrations of iron(III). (B)  $R_1$  relaxivity of DITH as a function of molar concentration of iron(III) in solution.
